# Supplementary material for: Genomic Features of Antimicrobial Resistance in Staphylococcus pseudintermedius Isolated from Dogs with Pyoderma in Argentina and the United States: A Comparative Study
Source: MDPI journal article supplement (doi:10.3390/ijms241411361), 2023-07-12
Supplement: s1 [file s1]

**Table S1. Best match predictions (highlighted in grey) based on mapping against all SCCmec type references.**

| Isolate ID      | Reference (accession number) | ID %  | Coverage % | Best match |
|-----------------|------------------------------|-------|------------|------------|
| BI1985          | SCCmec III (AM904732.1)      | 99.96 | 92.60      | SCCmec III |
| NY14853PPY10094 | SCCmec III (AM904732.1)      | 99.80 | 100        | SCCmec III |
| MI48910PPY10092 | SCCmec III (AM904732.1)      | 92.80 | 100        | SCCmec III |
| AL36849PPY10048 | SCCmec IVa (AB063172)        | 78.20 | 76.70      | SCCmec IVg |
|                 | SCCmec IVb (AB063173)        | 78.70 | 90.60      |            |
|                 | SCCmec IVc (AB096217)        | 83.00 | 65.50      |            |
|                 | SCCmec IVd (AB097677)        | 87.50 | 62.00      |            |
|                 | SCCmec IVg (DQ106887)        | 87.30 | 99.10      |            |
|                 | SCCmec IVh (HE681097)        | 79.80 | 78.40      |            |
|                 | SCCmec IVi (AB425823)        | 92.10 | 10.10      |            |
|                 | SCCmec IVj (AB425824)        | 79.60 | 61.10      |            |
|                 | SCCmec IVk (GU122149)        | 76.20 | 7.40       |            |
|                 | SCCmec IVl (AB633329)        | 80.30 | 54.40      |            |
|                 | SCCmec IVm (AB872254)        | 79.60 | 61.10      |            |
|                 | SCCmec IVn (KX385846.1)      | 82.20 | 80.30      |            |
| AL36849PPY10061 | SCCmec IVa (AB063172)        | 84.50 | 87.30      | SCCmec IVg |
|                 | SCCmec IVb (AB063173)        | 86.10 | 99.90      |            |
|                 | SCCmec IVc (AB096217)        | 83.10 | 75.50      |            |
|                 | SCCmec IVd (AB097677)        | 75.70 | 81.30      |            |
|                 | SCCmec IVg (DQ106887)        | 99.40 | 99.90      |            |
|                 | SCCmec IVh (HE681097)        | 86.40 | 81.70      |            |
|                 | SCCmec IVi (AB425823)        | 81.80 | 94.50      |            |
|                 | SCCmec IVj (AB425824)        | 87.00 | 95.90      |            |
|                 | SCCmec IVk (GU122149)        | 77.60 | 41.20      |            |
|                 | SCCmec IVl (AB633329)        | 86.30 | 62.00      |            |
|                 | SCCmec IVm (AB872254)        | 80.80 | 23.20      |            |
|                 | SCCmec IVn (KX385846.1)      | 80.70 | 79.70      |            |
| KS66506PPY30089 | SCCmec IVa (AB063172)        | 94.80 | 65.90      | SCCmec IVg |
|                 | SCCmec IVb (AB063173)        | 95.10 | 77.60      |            |
|                 | SCCmec IVc (AB096217)        | 97.30 | 52.60      |            |
|                 | SCCmec IVd (AB097677)        | 97.20 | 52.10      |            |
|                 | SCCmec IVg (DQ106887)        | 99.40 | 86.20      |            |
|                 | SCCmec IVh (HE681097)        | 97.20 | 63.70      |            |
|                 | SCCmec IVi (AB425823)        | 91.70 | 72.70      |            |
|                 | SCCmec IVj (AB425824)        | 98.10 | 72.00      |            |
|                 | SCCmec IVk (GU122149)        | 94.60 | 32.30      |            |
|                 | SCCmec IVl (AB633329)        | 97.10 | 46.60      |            |
|                 | SCCmec IVm (AB872254)        | 92.10 | 57.10      |            |
|                 | SCCmec IVn (KX385846.1)      | 95.70 | 59.80      |            |
| ND58102PPY20076 | SCCmec IVa (AB063172)        | 79.70 | 69.70      | SCCmec IVg |

|        |                          |       |       |                  |
|--------|--------------------------|-------|-------|------------------|
|        | SCCmec IVb (AB063173)    | 80.20 | 82.20 |                  |
|        | SCCmec IVc (AB096217)    | 97.40 | 36.10 |                  |
|        | SCCmec IVd (AB097677)    | 96.20 | 52.70 |                  |
|        | SCCmec IVg (DQ106887)    | 85.90 | 90.50 |                  |
|        | SCCmec IVh (HE681097)    | 95.90 | 48.40 |                  |
|        | SCCmec IVi (AB425823)    | 79.20 | 78.30 |                  |
|        | SCCmec IVj (AB425824)    | 82.50 | 76.30 |                  |
|        | SCCmec IVk (GU122149)    | 95.00 | 25.10 |                  |
|        | SCCmec IVl (AB633329)    | 81.80 | 49.30 |                  |
|        | SCCmec IVm (AB872254)    | 80.00 | 59.50 |                  |
|        | SCCmec IVn (KX385846.1)  | 94.30 | 46.60 |                  |
| BI1979 | SCCmec Va (AB121219.1)   | 87.30 | 52.60 | SCCmec V (5C2&5) |
|        | SCCmec Vb (AB462393.1)   | 91.50 | 62.80 |                  |
|        | SCCmec Vb (AB512767.1)   | 91.90 | 72.60 |                  |
|        | SCCmec Vb (AB478780.1)   | 91.60 | 72.70 |                  |
|        | SCCmec Vc (AB505629.1)   | 92.50 | 59.60 |                  |
|        | SCCmec V(T) (FJ544922.1) | 99.80 | 95.40 |                  |
| BI1980 | SCCmec Va (AB121219.1)   | 81.30 | 62.60 | SCCmec V (5C2&5) |
|        | SCCmec Vb (AB462393.1)   | 83.70 | 51.20 |                  |
|        | SCCmec Vb (AB512767.1)   | 83.90 | 59.10 |                  |
|        | SCCmec Vb (AB478780.1)   | 83.70 | 59.30 |                  |
|        | SCCmec Vc (AB505629.1)   | 82.90 | 50.60 |                  |
|        | SCCmec V(T) (FJ544922.1) | 84.80 | 89.30 |                  |
| BI1981 | SCCmec Va (AB121219.1)   | 84.80 | 55.20 | SCCmec V (5C2&5) |
|        | SCCmec Vb (AB462393.1)   | 97.90 | 47.80 |                  |
|        | SCCmec Vb (AB512767.1)   | 98.50 | 55.20 |                  |
|        | SCCmec Vb (AB478780.1)   | 98.00 | 55.30 |                  |
|        | SCCmec Vc (AB505629.1)   | 99.00 | 49.30 |                  |
|        | SCCmec V(T) (FJ544922.1) | 99.70 | 91.30 |                  |
| BI1984 | SCCmec Va (AB121219.1)   | 80.00 | 54.80 | SCCmec V (5C2&5) |
|        | SCCmec Vb (AB462393.1)   | 89.00 | 42.90 |                  |
|        | SCCmec Vb (AB512767.1)   | 89.30 | 49.40 |                  |
|        | SCCmec Vb (AB478780.1)   | 89.00 | 49.60 |                  |
|        | SCCmec Vc (AB505629.1)   | 88.50 | 43.10 |                  |
|        | SCCmec V(T) (FJ544922.1) | 91.50 | 71.80 |                  |
| BI1990 | SCCmec Va (AB121219.1)   | 81.70 | 54.80 | SCCmec V (5C2&5) |
|        | SCCmec Vb (AB462393.1)   | 90.20 | 42.10 |                  |
|        | SCCmec Vb (AB512767.1)   | 90.10 | 50.40 |                  |
|        | SCCmec Vb (AB478780.1)   | 90.20 | 48.80 |                  |
|        | SCCmec Vc (AB505629.1)   | 91.10 | 38.90 |                  |
|        | SCCmec V(T) (FJ544922.1) | 91.60 | 65.50 |                  |
| BI1991 | SCCmec Va (AB121219.1)   | 82.90 | 48.10 | SCCmec V (5C2)   |
|        | SCCmec Vb (AB462393.1)   | 83.80 | 28.60 |                  |
|        | SCCmec Vb (AB512767.1)   | 83.80 | 33.40 |                  |

|                 |                          |       |       |                  |
|-----------------|--------------------------|-------|-------|------------------|
|                 | SCCmec Vb (AB478780.1)   | 83.40 | 33.00 |                  |
|                 | SCCmec Vc (AB505629.1)   | 85.10 | 27.90 |                  |
|                 | SCCmec V(T) (FJ544922.1) | 73.00 | 61.30 |                  |
| BI2002          | SCCmec Va (AB121219.1)   | 79.40 | 69.00 |                  |
|                 | SCCmec Vb (AB462393.1)   | 80.10 | 39.60 |                  |
|                 | SCCmec Vb (AB512767.1)   | 80.10 | 46.30 | SCCmec V (5C2)   |
|                 | SCCmec Vb (AB478780.1)   | 80.00 | 45.80 |                  |
|                 | SCCmec Vc (AB505629.1)   | 84.80 | 28.40 |                  |
|                 | SCCmec V(T) (FJ544922.1) | 73.30 | 62.20 |                  |
| BI2003          | SCCmec Va (AB121219.1)   | 81.70 | 56.60 |                  |
|                 | SCCmec Vb (AB462393.1)   | 87.50 | 54.00 |                  |
|                 | SCCmec Vb (AB512767.1)   | 87.80 | 62.40 | SCCmec V (5C2&5) |
|                 | SCCmec Vb (AB478780.1)   | 87.50 | 62.50 |                  |
|                 | SCCmec Vc (AB505629.1)   | 93.70 | 38.90 |                  |
|                 | SCCmec V(T) (FJ544922.1) | 94.70 | 72.50 |                  |
| BI2004          | SCCmec Va (AB121219.1)   | 79.90 | 49.10 |                  |
|                 | SCCmec Vb (AB462393.1)   | 91.90 | 48.50 |                  |
|                 | SCCmec Vb (AB512767.1)   | 92.30 | 56.00 | SCCmec V (5C2&5) |
|                 | SCCmec Vb (AB478780.1)   | 92.70 | 54.20 |                  |
|                 | SCCmec Vc (AB505629.1)   | 92.20 | 44.40 |                  |
|                 | SCCmec V(T) (FJ544922.1) | 93.50 | 82.90 |                  |
| BI2008          | SCCmec Va (AB121219.1)   | 90.60 | 37.90 |                  |
|                 | SCCmec Vb (AB462393.1)   | 88.10 | 24.70 |                  |
|                 | SCCmec Vb (AB512767.1)   | 87.30 | 30.30 | SCCmec V (5C2)   |
|                 | SCCmec Vb (AB478780.1)   | 88.10 | 28.60 |                  |
|                 | SCCmec Vc (AB505629.1)   | 88.50 | 24.90 |                  |
|                 | SCCmec V(T) (FJ544922.1) | 75.70 | 55.80 |                  |
| KY40511PPY30123 | SCCmec Va (AB121219.1)   | 81.40 | 42.40 |                  |
|                 | SCCmec Vb (AB462393.1)   | 86.50 | 54.60 |                  |
|                 | SCCmec Vb (AB512767.1)   | 87.60 | 61.80 | SCCmec V (5C2&5) |
|                 | SCCmec Vb (AB478780.1)   | 87.20 | 62.10 |                  |
|                 | SCCmec Vc (AB505629.1)   | 90.50 | 42.30 |                  |
|                 | SCCmec V(T) (FJ544922.1) | 92.00 | 85.10 |                  |
| LA70803PPY30016 | SCCmec Va (AB121219.1)   | 70.90 | 28.90 |                  |
|                 | SCCmec Vb (AB462393.1)   | 49.80 | 33.20 |                  |
|                 | SCCmec Vb (AB512767.1)   | 50.10 | 38.10 | SCCmec V (C52)   |
|                 | SCCmec Vb (AB478780.1)   | 49.80 | 38.50 |                  |
|                 | SCCmec Vc (AB505629.1)   | 50.00 | 34.10 |                  |
|                 | SCCmec V(T) (FJ544922.1) | 50.00 | 57.80 |                  |
| MI48910PPY20187 | SCCmec Va (AB121219.1)   | 87.10 | 37.70 |                  |
|                 | SCCmec Vb (AB462393.1)   | 84.40 | 45.30 |                  |
|                 | SCCmec Vb (AB512767.1)   | 84.90 | 51.80 | SCCmec V (5C2&5) |
|                 | SCCmec Vb (AB478780.1)   | 84.60 | 52.20 |                  |
|                 | SCCmec Vc (AB505629.1)   | 84.90 | 39.30 |                  |

|                 |                          |       |        |                  |
|-----------------|--------------------------|-------|--------|------------------|
|                 | SCCmec V(T) (FJ544922.1) | 86.20 | 74.10  |                  |
| MO65211PPY31146 | SCCmec Va (AB121219.1)   | 32.20 | 100.00 |                  |
|                 | SCCmec Vb (AB462393.1)   | 45.60 | 100.00 |                  |
|                 | SCCmec Vb (AB512767.1)   | 28.40 | 100.00 | SCCmec V (5C2&5) |
|                 | SCCmec Vb (AB478780.1)   | 48.00 | 100.00 |                  |
|                 | SCCmec Vc (AB505629.1)   | 45.40 | 100.00 |                  |
|                 | SCCmec V(T) (FJ544922.1) | 99.99 | 100.00 |                  |
| TX77840PPY20121 | SCCmec Va (AB121219.1)   | 84.90 | 70.00  |                  |
|                 | SCCmec Vb (AB462393.1)   | 94.70 | 56.80  |                  |
|                 | SCCmec Vb (AB512767.1)   | 95.40 | 65.70  | SCCmec V (5C2&5) |
|                 | SCCmec Vb (AB478780.1)   | 94.80 | 65.80  |                  |
|                 | SCCmec Vc (AB505629.1)   | 98.30 | 53.80  |                  |
|                 | SCCmec V(T) (FJ544922.1) | 99.98 | 80.20  |                  |
| WI53706PPY30014 | SCCmec Va (AB121219.1)   | 69.10 | 100.00 |                  |
|                 | SCCmec Vb (AB462393.1)   | 46.30 | 99.50  |                  |
|                 | SCCmec Vb (AB512767.1)   | 48.90 | 99.40  | SCCmec V (5C2&5) |
|                 | SCCmec Vb (AB478780.1)   | 48.80 | 99.40  |                  |
|                 | SCCmec Vc (AB505629.1)   | 48.50 | 100.00 |                  |
|                 | SCCmec V(T) (FJ544922.1) | 52.10 | 86.10  |                  |
